# Supplementary material for: Indication of Proximal Gastrectomy for Advanced Proximal Gastric Cancer Based on Lymph Node Metastasis at the Distal Part of the Stomach
Source: PubMed Central journal article supplement — Ann Surg Open. 2021 Nov 24;2(4):e107. doi: 10.1097/AS9.0000000000000107 (PMC10455053; doi:10.1097/as9.0000000000000107), 2021-11-24
Supplement: as9-2-e107-s001.pdf [file as9-2-e107-s001.pdf]

Supplement 1. Previous studies of survival outcomes for total gastrectomy versus proximal gastrectomy

|      |                               |     |    |            |           |      |      |                                                                                                                                                                                                                   |
|------|-------------------------------|-----|----|------------|-----------|------|------|-------------------------------------------------------------------------------------------------------------------------------------------------------------------------------------------------------------------|
| 2018 | Rosa et al. <sup>28</sup>     | 75  | 75 | Upper body | T1–T4     | 46.5 | 56.7 | Survival outcomes were not significantly different (P=0.07).<br>PG was associated with surgical mortality, reflux esophagitis, anastomotic stricture.                                                             |
| 2016 | Sugoor et al. <sup>29</sup>   | 32  | 43 | Upper body | T1–T4     | 49.9 | 73.3 | Overall 2-year survival rates were not different (P=0.10).                                                                                                                                                        |
| 2006 | Kim et al. <sup>30</sup>      | 27  | 12 | Upper body | Stage I   | 63   | 81.5 | Survival outcomes of patients with Stage III (P=0.035) and Stage IV (P=0.026) were significantly different. TG should be performed when cancer stage is advanced.                                                 |
|      |                               | 20  | 12 |            | Stage II  | 59.1 | 64.8 |                                                                                                                                                                                                                   |
|      |                               | 41  | 16 |            | Stage III | 38.4 | 17.1 |                                                                                                                                                                                                                   |
|      |                               | 16  | 3  |            | Stage IV  | 19.6 | 0    |                                                                                                                                                                                                                   |
| 2004 | Yoo et al. <sup>31</sup>      | 185 | 74 | Upper body | T1–T4     | 47.8 | 54.8 | Survival outcomes were not significantly different (P=0.378).<br>PG was associated with reflux esophagitis and anastomotic stricture.                                                                             |
| 1998 | Harrison et al. <sup>32</sup> | 33  | 65 | Upper body | T1–T4     | 41   | 43   | Survival outcomes were not significantly different (P-value not reported).                                                                                                                                        |
| 1997 | Kitamura et al. <sup>33</sup> | 25  | 23 | Upper body | T1        | 88   | 100  | Survival outcomes were not significantly different (P-value not reported).<br>In T3 and T4 tumors, LN metastases were present along the lower part of the stomach.<br>PG should be performed for T and T2 tumors. |
|      |                               | 12  | 8  |            | T2        | 85   | 55   |                                                                                                                                                                                                                   |
|      |                               | 33  | 11 |            | T3        | 60   | 55   |                                                                                                                                                                                                                   |
|      |                               | 48  | 24 |            | T4        | 25   | 25   |                                                                                                                                                                                                                   |
| 1995 | Jakl et al. <sup>34</sup>     | 50  | 75 | EGJ cancer | T1–T4     | 18   | 17   | Survival outcomes were not significantly different (P-value not reported).                                                                                                                                        |
| 1988 | Moreaux et al. <sup>35</sup>  | 27  | 54 | EGJ cancer | T1–T4     | 40   | 28   | Survival outcomes were not significantly different (P=0.30).                                                                                                                                                      |

Abbreviations: EGJ, esophagogastric junction; LN, lymph node; PG, proximal gastrectomy; TG, total gastrectomy.
